# Supplementary material for: Distinct gibberellin functions during and after grapevine bud dormancy release
Source: PubMed Central journal article supplement (PMC5888973; doi:10.1093/jxb/ery022), 2018-01-27
Supplement: ery022_suppl_supplemental_figures_and_tables.pdf [file ery022_suppl_supplemental_figures_and_tables.pdf]

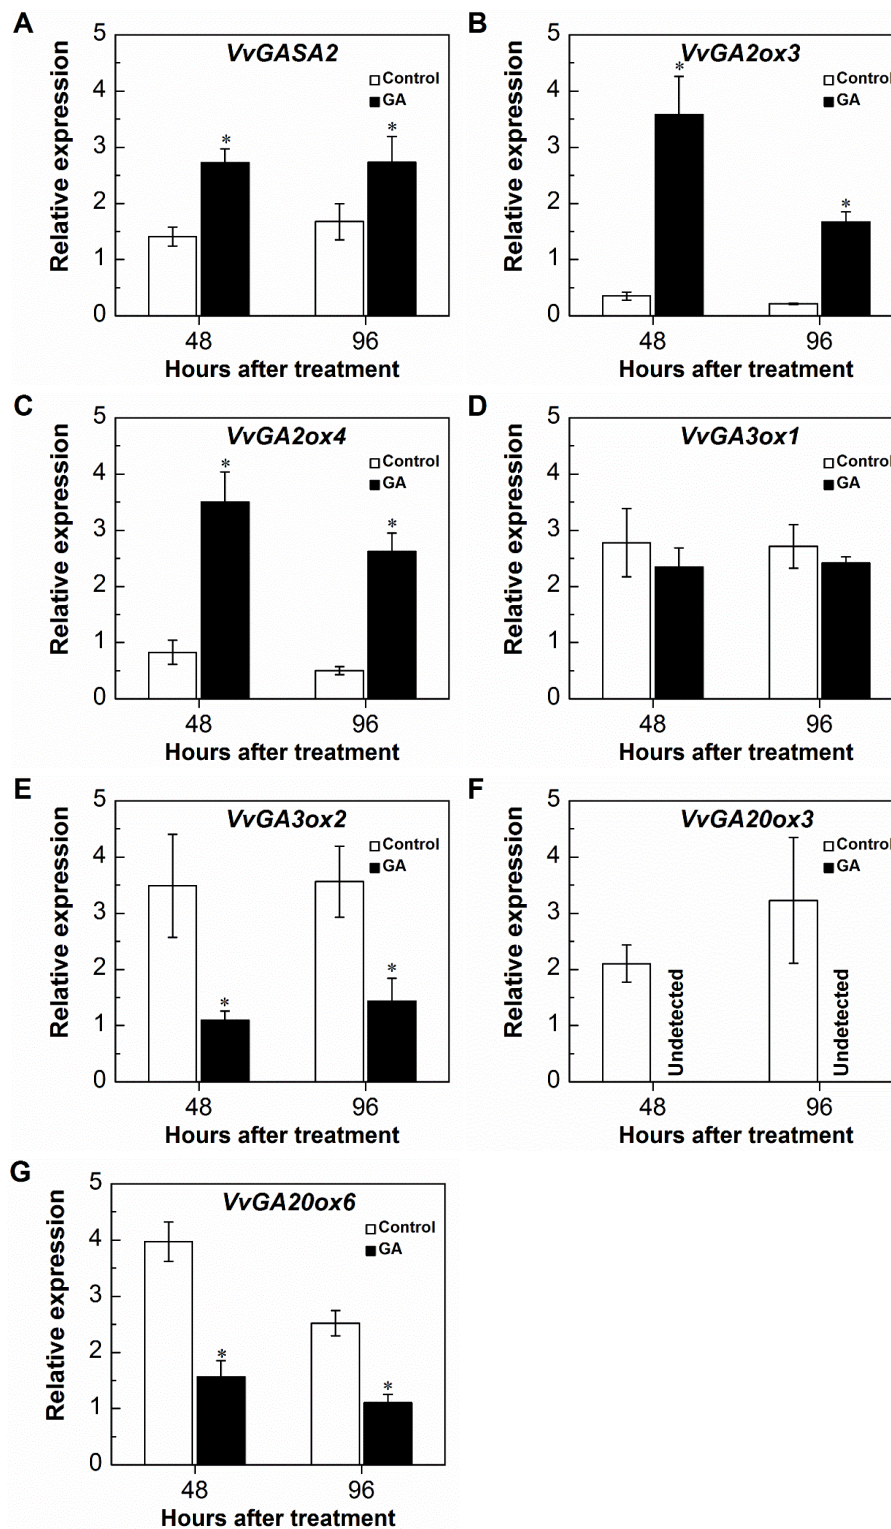

**Figure S1. The effect of GA<sub>3</sub> application on the expression profiles of the GA responsive *VvGASA2* gene and the central components of GA metabolism.** Total RNA was extracted from control (0.02% Triton X-100) and GA (10 ppm GA<sub>3</sub> with 0.02% Triton X-100) at 48 and 96 h after treatment, as described in Materials and Methods. Relative expression of *VvGASA2* (A), *VvGA2ox3* (B), *VvGA2ox4* (C), *VvGA3ox1* (D), *VvGA3ox2* (E), *VvGA20ox3* (F) and *VvGA20ox6* (G) were determined by qRT-PCR, as described in Materials and Methods, normalized against *VvActin* and *VvGAPDH*. Values represent the mean expression  $\pm$  SE of three biological replications, each with two technical repeats. Asterisks between treatments indicate significant differences according to Student's t-test (\*,  $P < 0.05$ ).

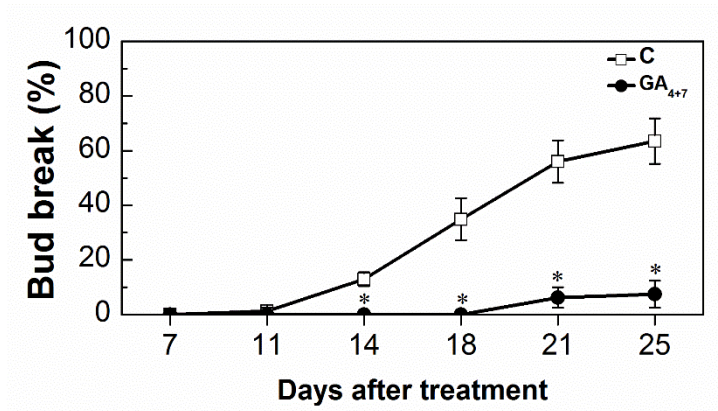

**Figure S2. The effect of GA<sub>4+7</sub> application on bud break of single node cuttings.** Cuttings were sprayed with 10 ppm GA<sub>4+7</sub> (ratio of GA<sub>4</sub> to GA<sub>7</sub> is 2:1, Duchefa, Haarlem, The Netherlands) formulated with 0.02% Triton X-100, placed in vases and monitored for 25 d as described in Materials and Methods. Triton X-100 (0.02%)-treated buds served as control. Values are averages of nine groups of replications, consisting of 10 buds each  $\pm$  SE. Asterisks between treatments indicate significant differences according to Student's t-test (\*,  $P < 0.05$ ).

**Table S1: Schematic details of all the GA treatments**

| <b>Figure</b> | <b>GA type</b>    | <b>GA app day</b> | <b>GA (ppm)</b> | <b>3% HC app day</b> | <b>Treatment label</b>  | <b>Monitoring days from 0 d</b> |
|---------------|-------------------|-------------------|-----------------|----------------------|-------------------------|---------------------------------|
| 4A            | GA <sub>3</sub>   | none              | none            | none                 | <b>Control</b>          | 24, 28                          |
| 4A            | GA <sub>3</sub>   | 0 d               | 1.25            | none                 | <b>GA (1.25)</b>        | 24, 28, 67                      |
| 4A            | GA <sub>3</sub>   | 0 d               | 2.5             | none                 | <b>GA (2.5)</b>         | 24, 28, 67                      |
| 4A            | GA <sub>3</sub>   | 0 d               | 5               | none                 | <b>GA (5)</b>           | 24, 28, 67, 77, 87, 95          |
| 4A            | GA <sub>3</sub>   | 0 d               | 10              | none                 | <b>GA (10)</b>          | 24, 28, 67, 77, 87, 95, 107     |
| 4A            | GA <sub>3</sub>   | 0 d               | 20              | none                 | <b>GA (20)</b>          | 24, 28, 67, 77, 87, 95, 107     |
| 4A            | GA <sub>3</sub>   | 0 d               | 40              | none                 | <b>GA (40)</b>          | 24, 28, 67, 77, 87, 95, 107     |
|               |                   |                   |                 |                      |                         |                                 |
| 4B            | GA <sub>3</sub>   | none              | none            | none                 | <b>Control</b>          | 7, 10, 14, 17, 21, 24, 28       |
| 4B            | GA <sub>3</sub>   | 0 d               | 0.001           | none                 | <b>GA (0.001)</b>       | 7, 10, 14, 17, 21, 24, 28       |
| 4B            | GA <sub>3</sub>   | 0 d               | 0.01            | none                 | <b>GA (0.01)</b>        | 7, 10, 14, 17, 21, 24, 28       |
| 4B            | GA <sub>3</sub>   | 0 d               | 0.1             | none                 | <b>GA (0.1)</b>         | 7, 10, 14, 17, 21, 24, 28       |
| 4B            | GA <sub>3</sub>   | 0 d               | 1               | none                 | <b>GA (1)</b>           | 7, 10, 14, 17, 21, 24, 28       |
|               |                   |                   |                 |                      |                         |                                 |
| S1            | GA <sub>4+7</sub> | none              | none            | none                 | <b>Control</b>          | 7, 11, 14, 18, 21, 25           |
| S1            | GA <sub>4+7</sub> | 0 d               | 10              | none                 | <b>GA<sub>4+7</sub></b> | 7, 11, 14, 18, 21, 25           |
|               |                   |                   |                 |                      |                         |                                 |
| 4C            | GA <sub>3</sub>   | none              | none            | none                 | <b>Control</b>          | 40, 48, 55                      |
| 4C            | GA <sub>3</sub>   | 0 d               | 10              | none                 | <b>GA</b>               | 40, 48, 55                      |
|               |                   |                   |                 |                      |                         |                                 |
| 5A            | GA <sub>3</sub>   | none              | none            | none                 | <b>Control</b>          | 11, 14, 18, 21, 25              |
| 5A            | GA <sub>3</sub>   | 0 d               | 1               | none                 | <b>GA (1)</b>           | 11, 14, 18, 21, 25              |
| 5A            | GA <sub>3</sub>   | 0 d               | 5               | none                 | <b>GA (5)</b>           | 11, 14, 18, 21, 25              |
| 5A            | GA <sub>3</sub>   | 0 d               | 10              | none                 | <b>GA (10)</b>          | 11, 14, 18, 21, 25              |
| 5B            | GA <sub>3</sub>   | none              | none            | 0 d                  | <b>HC</b>               | 11, 14, 18, 21, 25              |
| 5B            | GA <sub>3</sub>   | 0 d               | 1               | 0 d                  | <b>HC-GA (1)</b>        | 11, 14, 18, 21, 25              |
| 5B            | GA <sub>3</sub>   | 0 d               | 5               | 0 d                  | <b>HC-GA (5)</b>        | 11, 14, 18, 21, 25              |
| 5B            | GA <sub>3</sub>   | 0 d               | 10              | 0 d                  | <b>HC-GA (10)</b>       | 11, 14, 18, 21, 25              |
|               |                   |                   |                 |                      |                         |                                 |
| 7A            | GA <sub>3</sub>   | none              | none            | none                 | <b>Control</b>          | 11, 14, 18, 21                  |
| 7A            | GA <sub>3</sub>   | none              | none            | 0 d                  | <b>HC</b>               | 11, 14, 18, 21                  |
| 7A            | GA <sub>3</sub>   | 0 d               | 10              | 0 d                  | <b>HC-GA (0 d)</b>      | 11, 14, 18, 21                  |
| 7A            | GA <sub>3</sub>   | 2 d               | 10              | 0 d                  | <b>HC-GA (2 d)</b>      | 11, 14, 18, 21                  |
| 7A            | GA <sub>3</sub>   | 6 d               | 10              | 0 d                  | <b>HC-GA (6 d)</b>      | 11, 14, 18, 21                  |
| 7A            | GA <sub>3</sub>   | 10                | 10              | 0 d                  | <b>HC-GA (10 d)</b>     | 11, 14, 18, 21                  |
|               |                   |                   |                 |                      |                         |                                 |
| 7B            | GA <sub>3</sub>   | none              | none            | none                 | <b>Control</b>          | 7, 10, 11, 13, 14, 17, 21       |
| 7B            | GA <sub>3</sub>   | 0 d               | 1               | none                 | <b>GA (0 d)</b>         | 7, 10, 11, 13, 14, 17, 21       |
| 7B            | GA <sub>3</sub>   | 7 d               | 1               | none                 | <b>GA (7 d)</b>         | 7, 10, 11, 13, 14, 17, 21       |
|               |                   |                   |                 |                      |                         |                                 |
| 7C            | GA <sub>3</sub>   | none              | none            | none                 | <b>Control</b>          | 3, 4, 5, 6, 7, 10, 14           |
| 7C            | GA <sub>3</sub>   | 0 d               | 1               | none                 | <b>GA (0 d)</b>         | 3, 4, 5, 6, 7, 10, 14           |
| 7C            | GA <sub>3</sub>   | 3 d               | 1               | none                 | <b>GA (3 d)</b>         | 3, 4, 5, 6, 7, 10, 14           |

**Table S2: Primers used for gene expression analyses by qRT-PCR**

|                                                                                                                                     | <b>Forward primer (5' to 3')</b> | <b>Reverse primer (5' to 3')</b> | <b>Accession number</b>        |
|-------------------------------------------------------------------------------------------------------------------------------------|----------------------------------|----------------------------------|--------------------------------|
| <i>VvGA3ox1</i>                                                                                                                     | CCTCAGAACTCGTGGGTCAT             | TGGGCAGGTAGAGAGAAAAGG            | VIT_09s0002g05270 <sup>a</sup> |
| <i>VvGA3ox2</i>                                                                                                                     | CCCCACATACAGACTCATTGC            | TCCACCCAACCTCCATCTCTC            | VIT_04s0008g04940 <sup>a</sup> |
| <i>VvGA20ox3</i>                                                                                                                    | GCCTAAAACCCGACCTCACT             | GGACCACCATTTGTCATCTACA           | VIT_16s0022g02310 <sup>a</sup> |
| <i>VvGA20ox6</i>                                                                                                                    | GGTGTTCCTTCGTGTGCCCTA            | CTTCCTTGTCCCTTCTCTGC             | VIT_18s0001g01390 <sup>a</sup> |
| <i>VvGA2ox3</i>                                                                                                                     | TGTGAAGCATAGGGTGTGTTGA           | ATGAGTGAGGGCAATGGTG              | VIT_19s0140g00120 <sup>a</sup> |
| <i>VvGA2ox4</i>                                                                                                                     | GCTCTGCTGTGAGTGGTTACA            | ATGTGTGATGAGGCTGCTGA             | VIT_05s0077g00520 <sup>a</sup> |
| <i>VvGASA2</i>                                                                                                                      | CCCAAACCCCTCTCCTCTTTC            | GGCGATCCAATGCTTCGAAC             | VIT_14s0108g00740 <sup>a</sup> |
| <i>VvGAPDH</i>                                                                                                                      | TTCTCGTTGAGGGCTATTCCA            | CCACAGACTTCATCGGTGACA            | CB973647 <sup>b</sup>          |
| <i>VvActin</i>                                                                                                                      | CTTGCATCCCTCAGCACCTT             | TCCTGTGGACAATGGATGGA             | EC969944 <sup>b</sup>          |
| <sup>a</sup> Accessions from Ensemblplants: <a href="http://plants.ensembl.org/index.html">http://plants.ensembl.org/index.html</a> |                                  |                                  |                                |
| <sup>b</sup> NCBI accessions                                                                                                        |                                  |                                  |                                |
